# Supplementary material
Source: PubMed Central journal article supplement (PMC7270819)
Supplement: mmc2.pdf [file mmc2.pdf]

## **Guidance for Clinicians:** **Medical management for renal patients dying from COVID-19 related illness**

*This document covers the medical management of dyspnoea, respiratory secretions and delirium at the end of life, as well as symptoms specific to those with pre-existing renal failure.*

- Psychological and spiritual distress may be significant (for patients, whānau and staff); consideration should be made to minimize this and provide appropriate support.
- When converting opioids oral to subcutaneous – halve the dose (morphine 10mg orally = morphine 5mg SC)
- **eGFR <30mL/min we recommend use of fentanyl (if available) instead of morphine or oxycodone. However, in the absence of fentanyl it is reasonable to use other opioids to manage symptoms associated with EOL.**
- **Morphine and oxycodone have active metabolites that are renally cleared; in the context of renal failure these metabolites accumulate and can cause opioid toxicity and narcosis.**
- In an end of life (EOL) context, the complex pharmacology of methadone may make this a less favourable choice unless the patient is already established on it.
- SC = subcutaneous, CSCI = continuous subcutaneous infusion via syringe driver
- When converting opioids oral to subcutaneous – halve the dose (morphine 10mg orally = morphine 5mg SC)
- In the absence of syringe driver availability resort to regular SC opioid dosing (morphine and oxycodone only); NB: patients in renal failure will require much less frequent dosing, in the order of Q12H, no more than Q6H.
- All medications discussed in this document are compatible with each other and can be mixed in various combinations in the same syringe for CSCI, with the exception of frusemide which must be in a separate syringe.
- Vital sign monitoring is unnecessary, care should be guided by symptom needs and patient comfort

### **Management of dyspnoea:**

- Optimise positioning as guided by patient comfort
- Air movement, such as achieved by the use of a fan, can reduce the sensation of breathlessness
- Remove oxygen mask or nasal prongs if the patient is not tolerating these

#### Opioid naïve patients – oral dosing:

- Fentanyl 12.5 - 25 micrograms buccally Q1H PRN
- Oxycodone elixir 2.5 - 5 mg PO Q4H PRN OR
- Morphine elixir 2.5 - 5 mg PO Q4H PRN OR

#### Opioid naïve patients – injectable dosing (if loss of oral route or poor gut absorption):

- Fentanyl 12.5 - 25 micrograms SC Q1H PRN
- Oxycodone 2.5 - 5 mg SC Q4H PRN OR
- Morphine 2.5 - 5 mg SC Q4H PRN OR

#### Patients already on background opioids:

- Continue background opioid
- If patient has a fentanyl patch continue this
- Use approximately 1/6th of their total daily opioid dose PRN Q4H as a starting dose and titrate to effect.

#### Benzodiazepines dosing:

Useful in addition to opioids if significant anxiety/panic associated with dyspnoea.

- lorazepam 0.5 mg PO TDS PRN
- clonazepam tablets 0.25 - 0.5 mg BD PRN
- clonazepam drops (buccal 1 drop = 100 micrograms) 2-3 drops buccally Q8H PRN
- midazolam 1.25 – 5 mg SC Q1H PRN for anxiety associated with dyspnoea; start at lowest dose and titrate to effect.

#### Diuretics:

- Diuretics may still have a role if dyspnoea is due to fluid overload and pulmonary oedema, provided the patient has some urinary output. A trial of diuretic is reasonable, continued only if good diuresis results.
- Frusemide can be given SC either as a bolus or via CSCI if no IV access possible

DATED 25/3/20

- Due to volume limitations the maximum bolus dose per SC line is 40mg (4mL) and per CSCI is 300mg. If higher daily doses are required this can be achieved by:
  - CSCI 300 mg over 12 hours (giving a total of 600 mg in 24 hours)
  - CSCI 300 mg over 8 hours (giving a total of 900 mg over 24 hours)

#### CSCI dosing:

*Generic CSCI starting doses for management of dyspnoea for opioid and benzodiazepine naive:*

- fentanyl 100 micrograms + midazolam 10 mg over 24 hours
- morphine 10 mg + midazolam 10 mg over 24 hours OR
- oxycodone 10 mg + midazolam 10 mg over 24 hours OR

Ensure SC opioid and benzodiazepine PRNS are prescribed (as above) in addition to CSCI

NB: for patients already on long acting opioids (and benzodiazepines) the CSCI starting dose and PRN doses will need to be calculated based on their current baseline.

#### **Management of acute respiratory distress or severe dyspnoea at the end of life:**

**Crisis medications** should be available for all patients at risk of respiratory crisis at end of life; aiming to rapidly sedate patient in the context of extreme respiratory distress

*Generic SC crisis medications for opioid and benzodiazepine naïve patients:*

- morphine 5 - 10 mg Q10mins PRN OR fentanyl 100 micrograms Q10min PRN
- midazolam 5 - 10 mg Q10mins PRN
  - NB: in extreme distress the higher dose may be necessary

If escalating opioid and benzodiazepine doses are required to control respiratory distress, consider adding levomepromazine (Nozinan).

- levomepromazine can be effective in reducing respiratory distress without causing respiratory depression.
  - levomepromazine 6.25 - 12.5 mg SC Q2H PRN, titrate to effect
  - levomepromazine CSCI starting dose 12.5 mg over 24 hours, increase in 12.5 mg increments to effect

#### **Management of excessive respiratory tract secretions:**

- Avoid IV fluids;
  - These are futile at EOL and can contribute significantly to the volume of respiratory secretions
  - There is no evidence that parenteral fluids (SC or IV) improve a patient's sense of thirst
  - Thirst is mitigated by oral fluids and, if unable to swallow, good mouth care.
- Optimise positioning (as tolerated) to allow drainage of secretions
- Avoid suctioning - there is limited role for suctioning, only consider if visible secretions in the mouth are distressing the patient

Anti-secretory medications to reduce respiratory secretions include:

- hyoscine butylbromide (Buscopan) 20 mg SC Q4H AND/OR start CSCI 60 mg over 24 hours (maximum 120 mg total per 24 hours)
- glycopyrronium bromide (Glycopyrrolate) 200 - 400 micrograms SC Q4H/PRN AND/OR start CSCI 800-1600 micrograms over 24 hours (maximum 1600 micrograms total per 24 hours)
- octreotide 100 - 200 micrograms Q8H SC regularly OR CSCI 200 - 600 micrograms over 24 hours

#### **Management of delirium/agitation/restlessness:**

- Exclude urinary retention, faecal impaction or uncontrolled pain
- Pharmacological options: antipsychotic medication is recommended first line, not benzodiazepines

Antipsychotic dosing:

- haloperidol 0.5 - 1 mg SC Q4H PRN (max 5 mg in 24 hours – if needing more than this to control agitation switch to levomepromazine)

- levomepromazine (more sedating than haloperidol) 6.25 mg SC Q4H PRN is a reasonable starting dose, a range of 6.25 – 12.5 mg may be used (doses of 25-50mg/24 hours are typically sedating)
- If agitation is severe a higher bolus dose of levomepromazine such as 25 - 50 mg may be required and/or commencement of a CSCI

**Management of nausea related to uraemia:**

- haloperidol 0.5 mg SC Q4H/PRN OR CSCI 1 - 3 mg over 24 hours (max 5mg total over 24 hours); if haloperidol ineffective in controlling nausea switch to levomepromazine
- levomepromazine (Nozinan) 3.125 - 6.25mg Q4H/PRN OR CSCI starting dose 6.25mg over 24 hours up to 25mg over 24 hours (doses greater than 25mg are unlikely to provide additional antiemesis and will cause sedation).

**Management of uraemic itch:**

- Topical - Aqueous cream 1% menthol
- If able to swallow; consider:
  - gabapentin 100 mg or pregabalin 25mg nocte (do not increase dose)
  - mirtazapine 15mg nocte
  - paroxetine 10mg mane

**Management of bleeding:**

- Platelet dysfunction associated with uraemia increases bleeding risk in renal patients; usually limited to mucosal bleeding.
- Avoid anticoagulation
- If risk of catastrophic bleed please follow our **Management of Catastrophic Bleeding** guideline available on the Waikato DHB Palliative Care Service intranet site:  
[https://intranet.sharepoint.waikato.health.govt.nz/site/pol/published/Catastrophic%20Bleeding.%20management%20of%20\(Palliative%20Care\).pdf#search=oncology%20palliative%20care](https://intranet.sharepoint.waikato.health.govt.nz/site/pol/published/Catastrophic%20Bleeding.%20management%20of%20(Palliative%20Care).pdf#search=oncology%20palliative%20care)

**For management of other symptoms such as pain please refer to our guidelines:**

**Waikato DHB Palliative Care Service intranet site:**

<https://intranet.sharepoint.waikato.health.govt.nz/Pages/Regional%20Cancer%20Centre/Palliative-Care-services-and-resources.aspx>

**Hospice Waikato website:**

Health professionals: <https://www.hospicewaikato.org.nz/education>

Clinical guidelines and drug protocols:

<https://www.hospicewaikato.org.nz/clinicalguidelinesdrugprotocols>

**For further Specialist Palliative Care advice contact the SMO oncall via switchboard**
